# Supplementary material
Source: PubMed Central journal article supplement (PMC3208656)

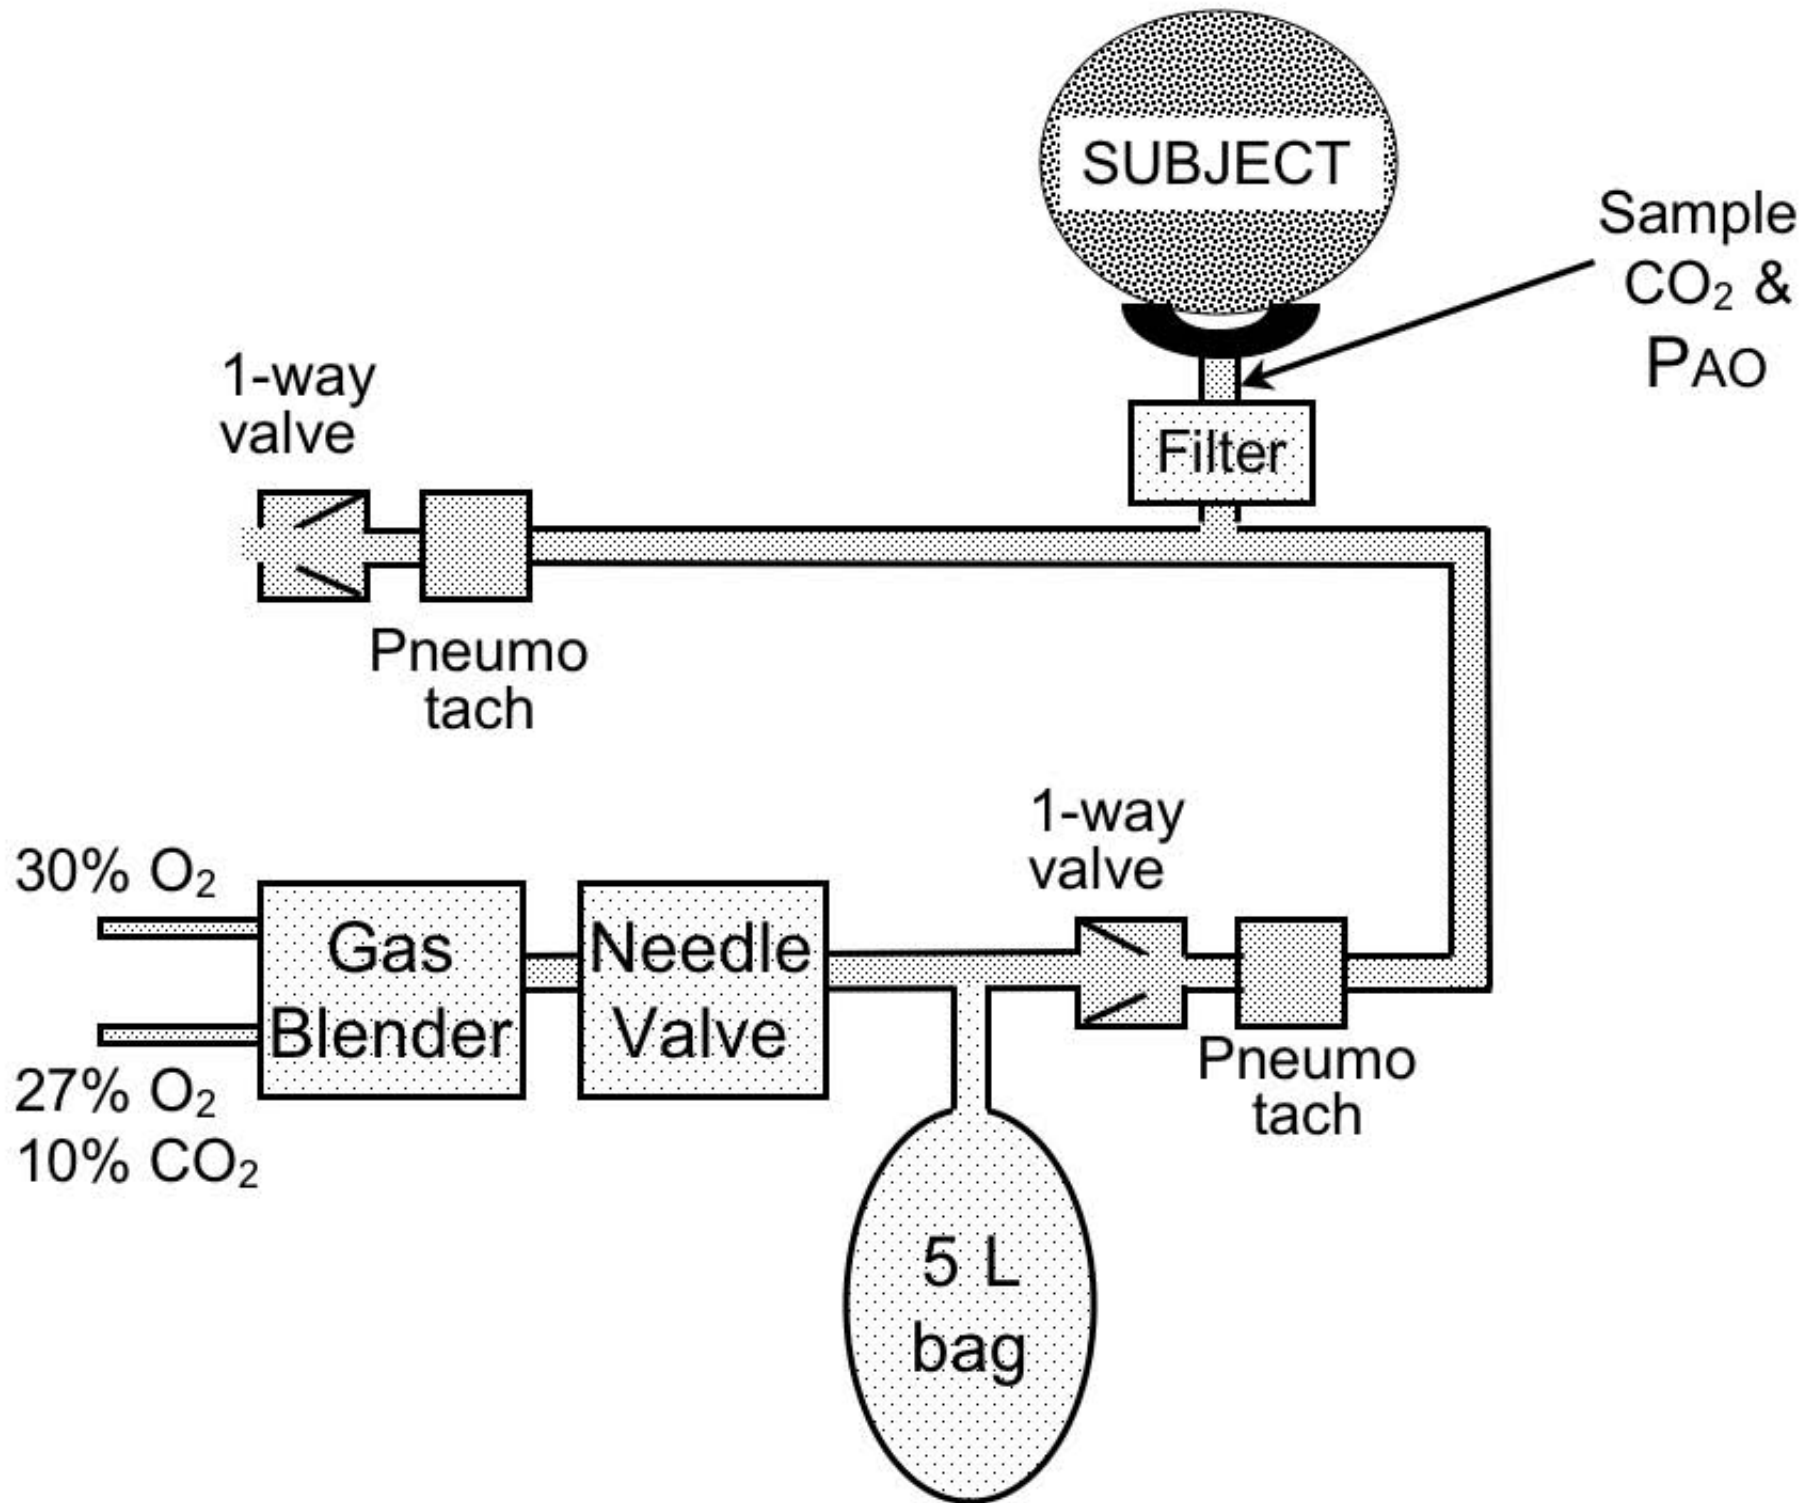

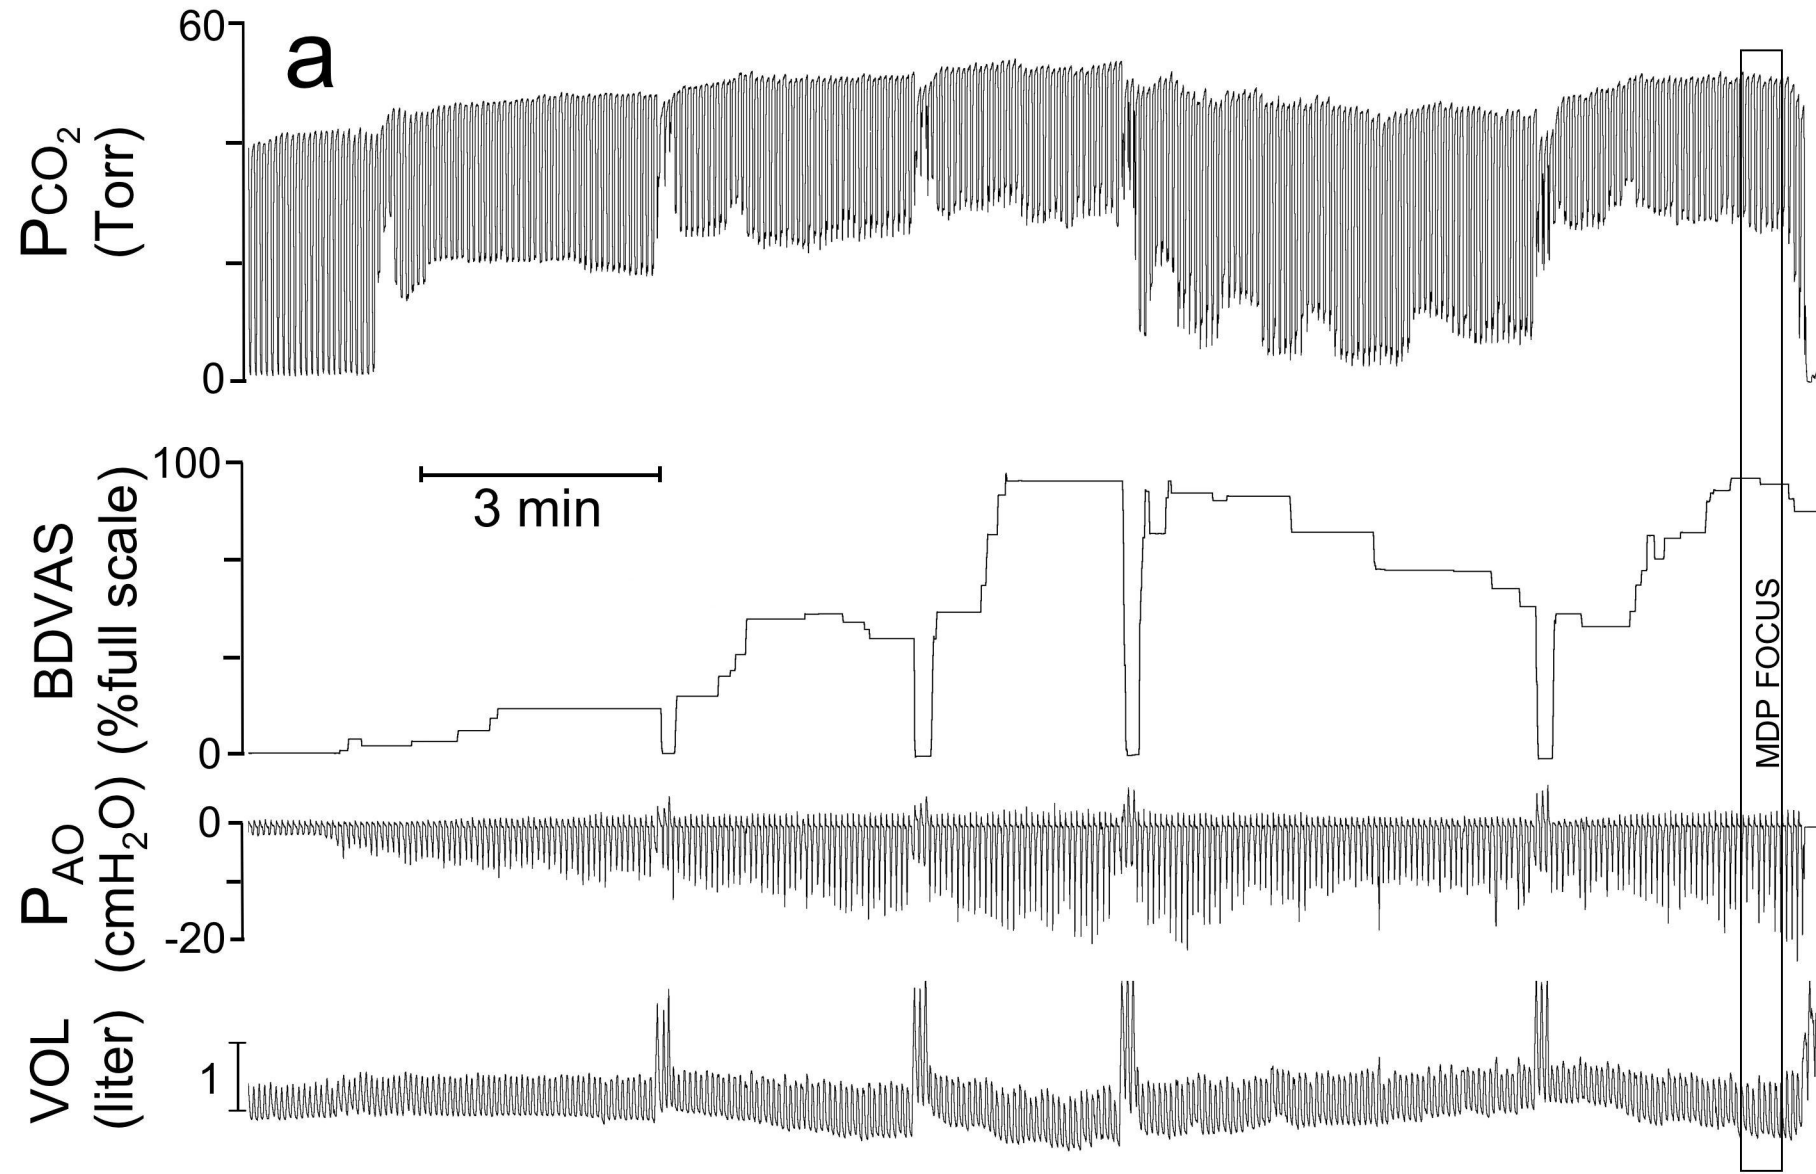

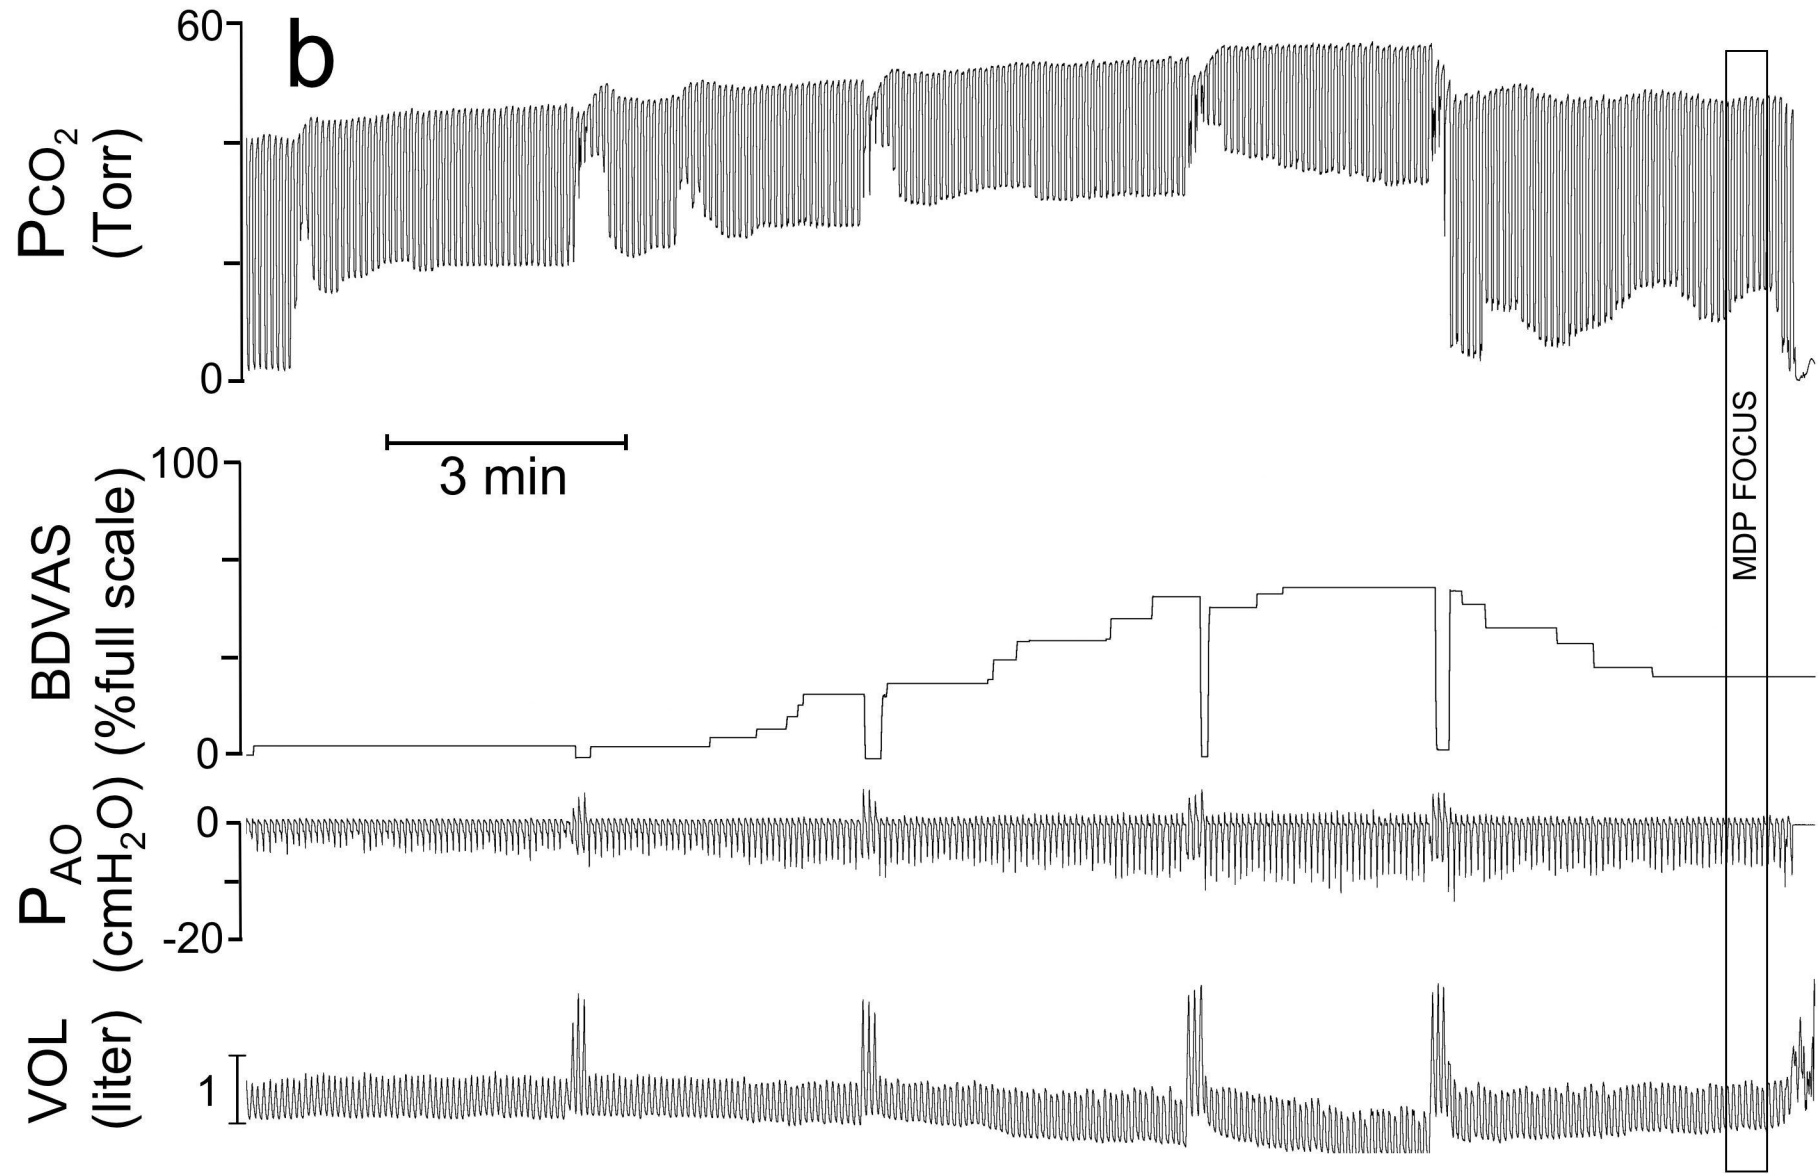

BREATHING DISCOMFORT

% Full Scale

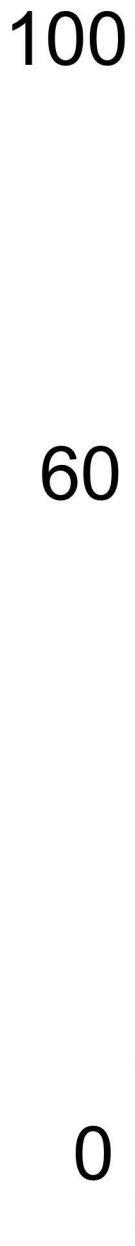

PETCO<sub>2</sub> INCREASE ABOVE RESTING (Torr)

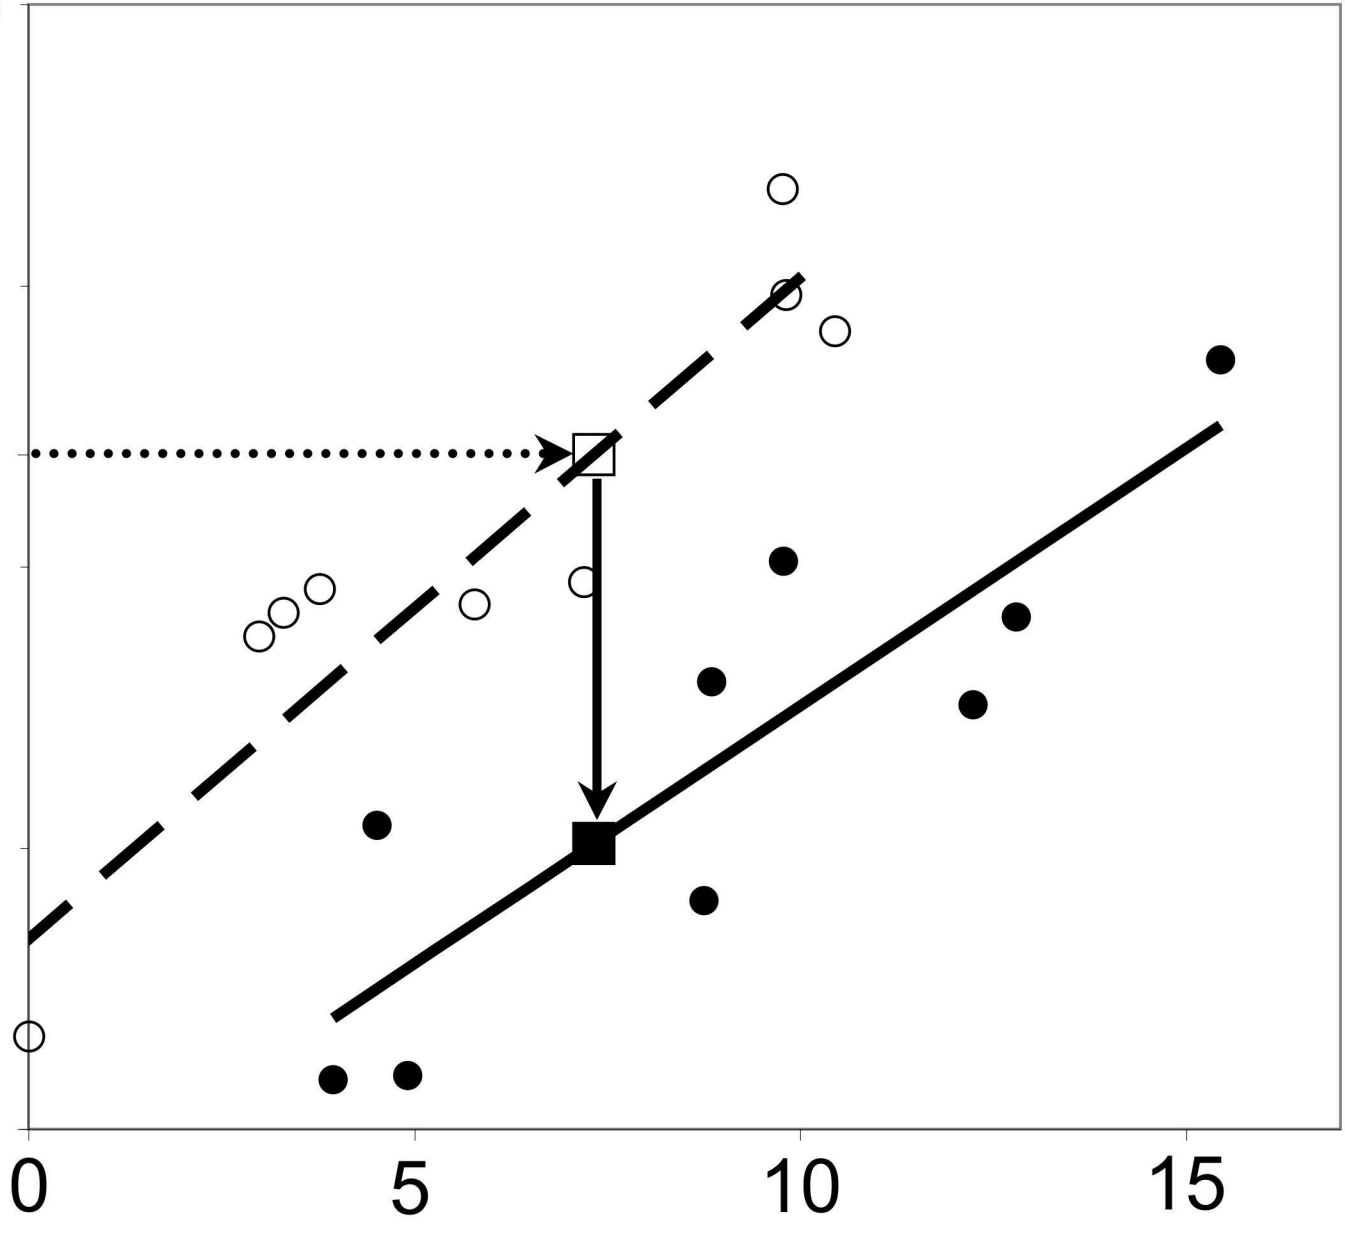

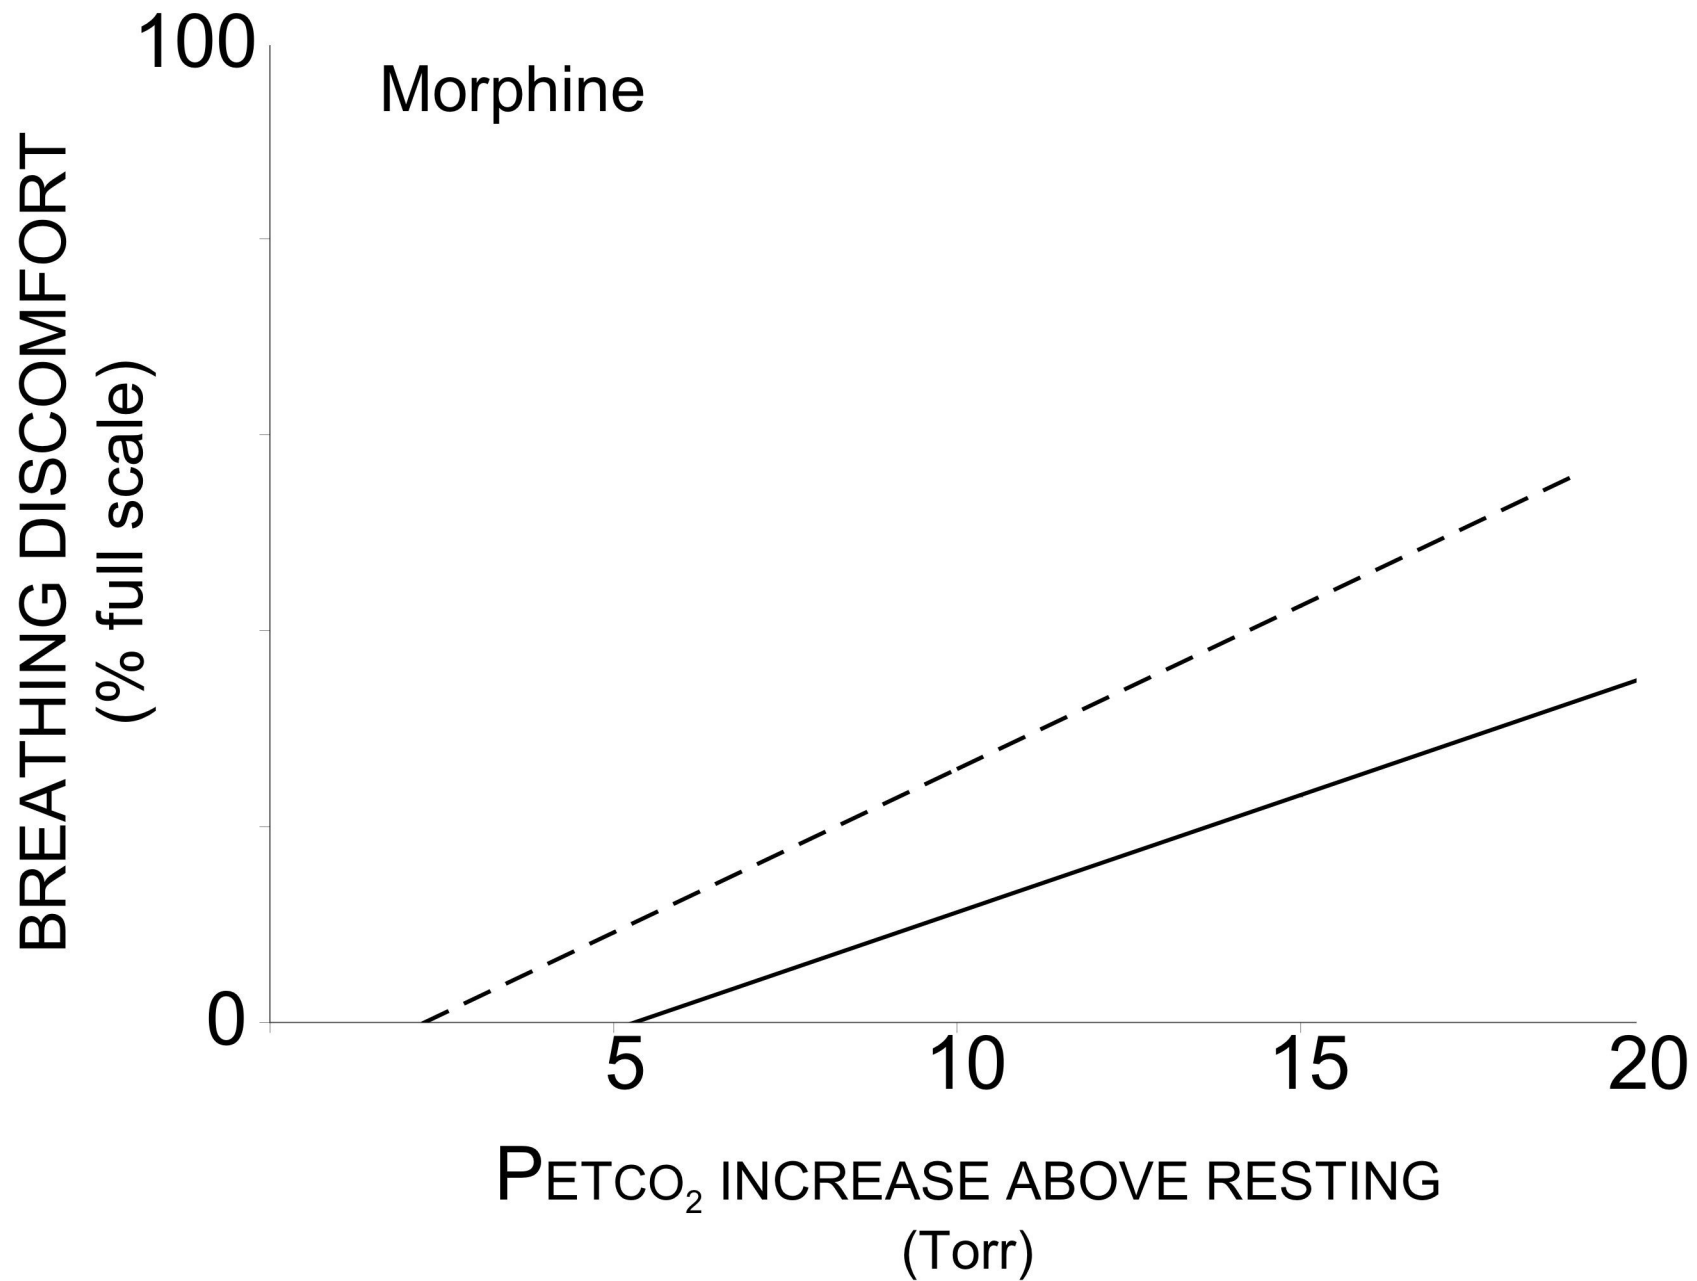

Supplement: supp_184_8_920__2.pdf [file supp_184_8_920__2.pdf]
